# Supplementary material for: Circulating β cell‐specific CD8+ T cells restricted by high‐risk HLA class I molecules show antigen experience in children with and at risk of type 1 diabetes
Source: PubMed Central journal article supplement (PMC7008222; doi:10.1111/cei.13391), 2019-11-10

# Supplementary Figure 5

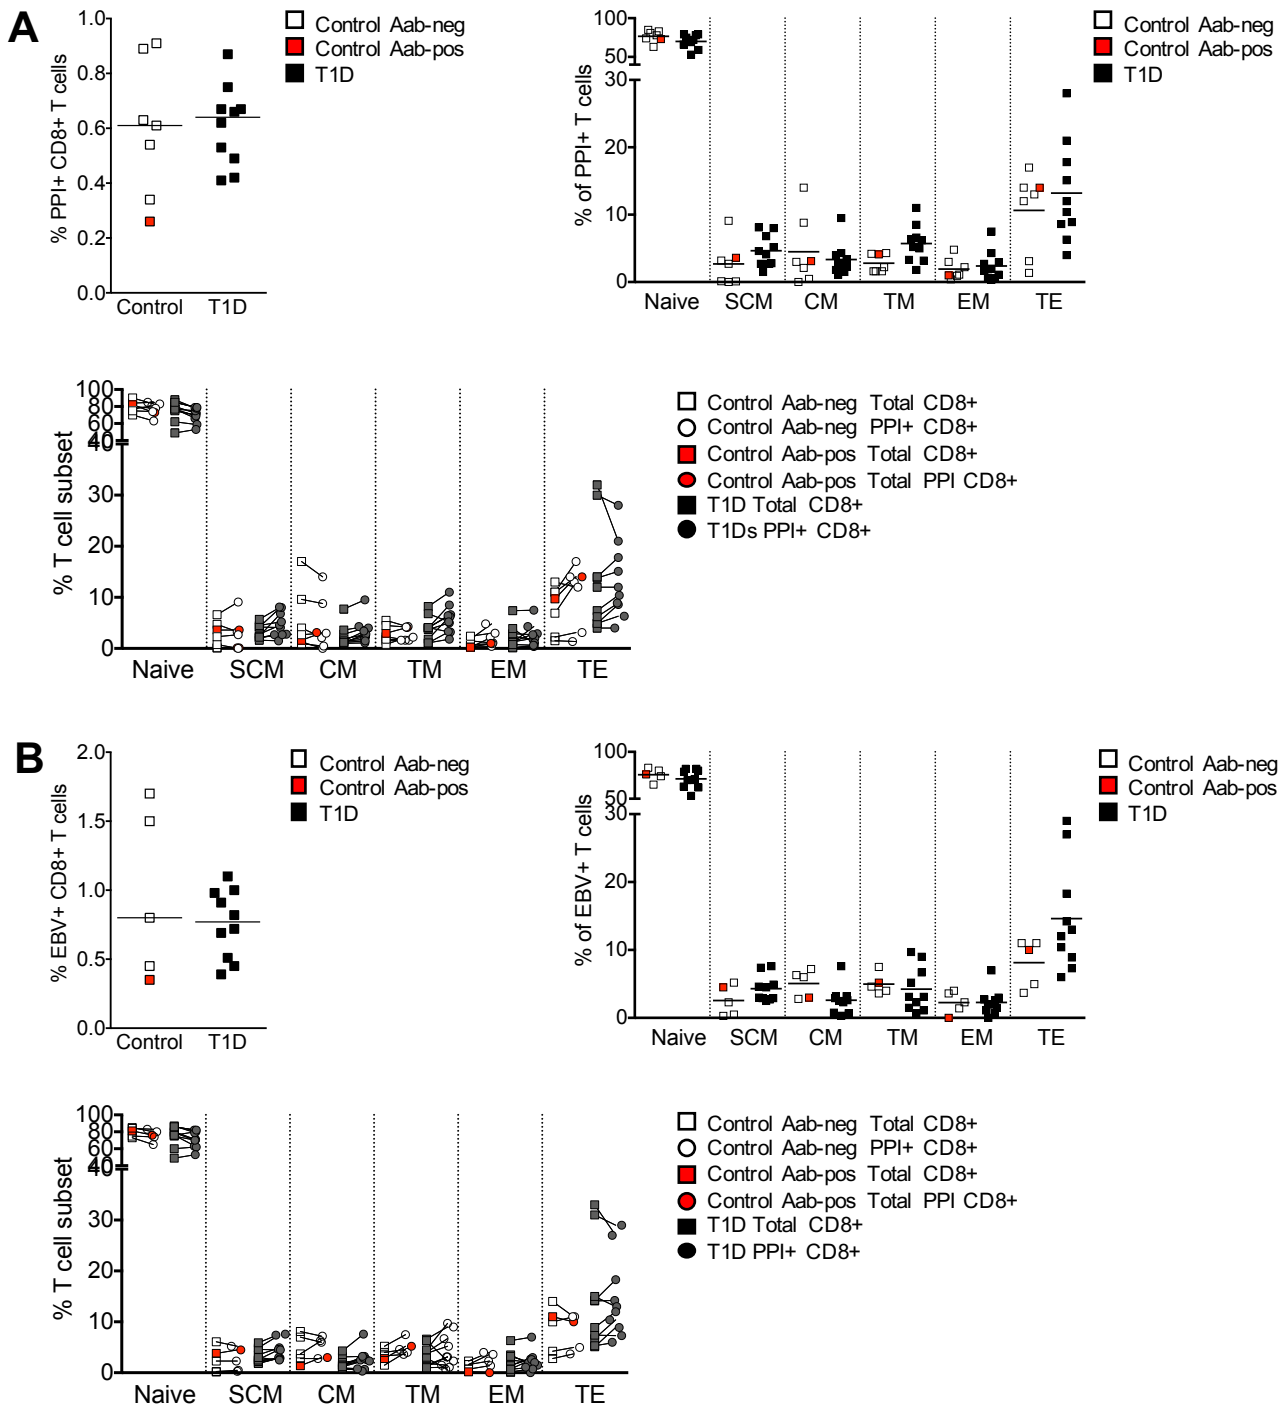

Supplement: CEI-199-263-s005.pdf [file CEI-199-263-s005.pdf]
